# Supplementary material for: Modulation of Fatty Acid Composition of Aspergillus oryzae in Response to Ethanol Stress
Source: PubMed Central journal article supplement (PMC6616634; doi:10.3390/microorganisms7060158), 2019-06-01
Supplement: microorganisms-07-00158-s001.pdf [file microorganisms-07-00158-s001.pdf]

**Table S1.** Primers used in quantitative real-time PCR.

| Primers    | 5'-3'                 |
|------------|-----------------------|
| GAPDH-F    | ACCGCGGTTTCATGCTTATAC |
| GAPDH-R    | GATCGACATTCGGTCACTT   |
| 18S rRNA-F | TTACCCAATCCCGACAC     |
| 18S rRNA-R | CCAGACTTGCCCTCCA      |
| d9d1-F     | CCCTGGTCCTGTCAGTCGTA  |
| d9d1-R     | CACGCTGTATGGGTCAAGGT  |
| d9d2-F     | CGTCATAACCGCCTTCGTAA  |
| d9d2-R     | TGTGGATGCGACCTTTTTTC  |
| d12d-F     | CCCTGCTAGTGCCGIACTTC  |
| d12d-R     | GATGGGAGTCTCCTCCATCA  |

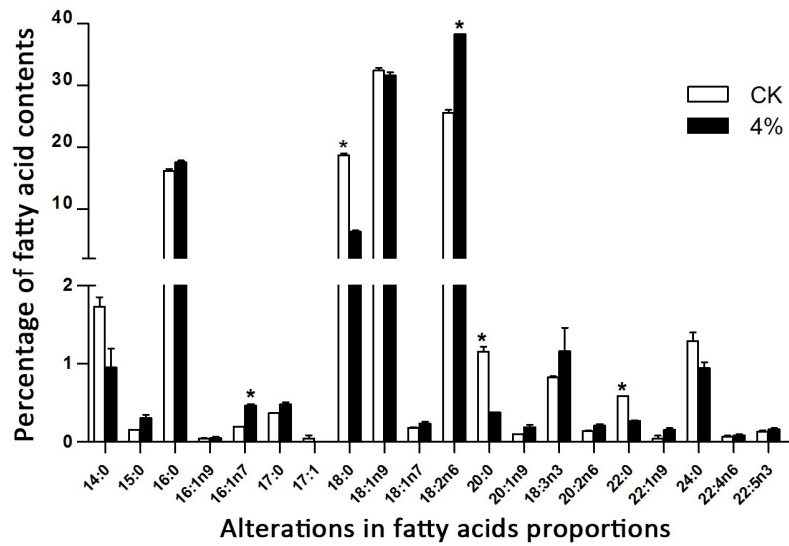

**Figure S1.** Alterations in the intracellular fatty acid proportions in response to 4% ethanol 36 h post-treatment. The bars represent the average ( $\pm$ SE) of the biological repeats. The asterisks indicate statistically significant differences between groups (Student's *t*-test): \* denotes  $P < 0.05$ .
